# Supplementary material for: Endocytosis frustration potentiates compression-induced receptor signalling
Source: Oxford University Press journal article supplement (doi:10.1242/jcs.239681), 2020-01-01
Supplement: jcs239681supp.pdf [file jcs239681supp.pdf]

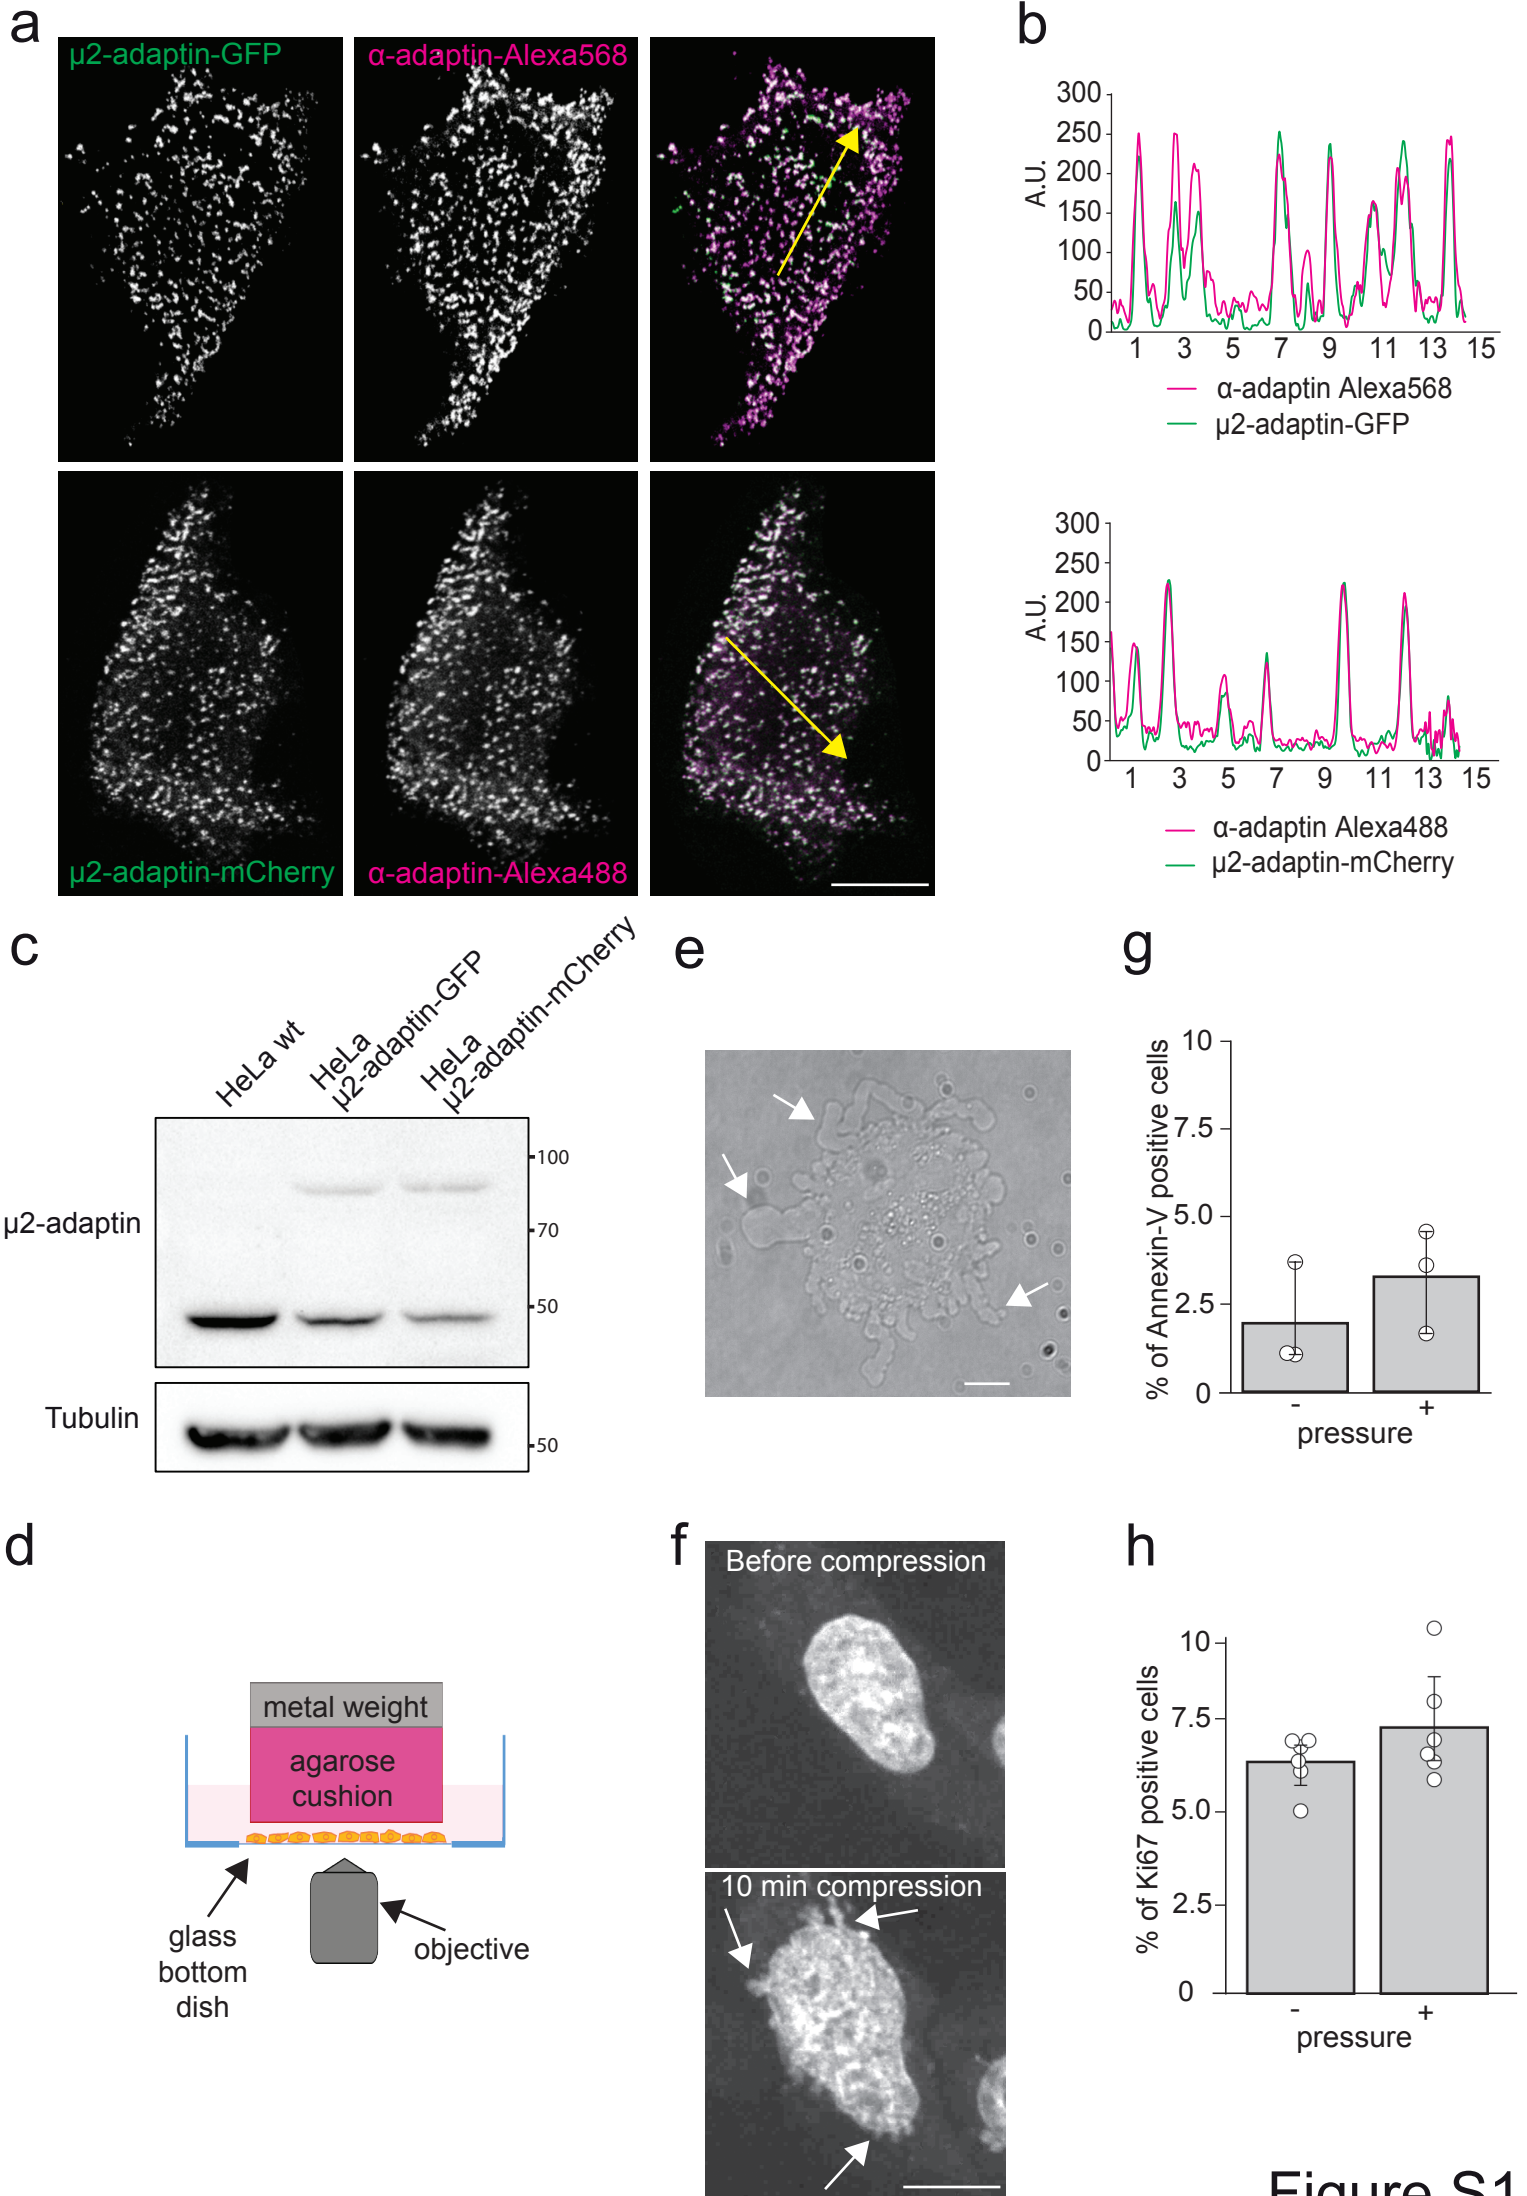

Figure S1

**Figure S1. Validation of the cell compression strategy.** **a**, HeLa cells genome-edited to express a fluorescently-tagged version of  $\mu$ 2-adaptin, a subunit of the clathrin adaptor AP-2, were immunostained using antibodies against  $\alpha$ -adaptin, another subunit of the AP-2 complex. Scale bar: 10  $\mu$ m. **b**, Intensity plot corresponding to the regions marked by yellow arrows in images in **a**. **c**, Western-blot analysis of  $\mu$ 2-adaptin levels in HeLa cells wt or genome-edited to express a fluorescently-tagged version of  $\mu$ 2-adaptin. Tubulin was used as loading control. **d**, schematic of our cell compression imaging set-up. **e**, Wide-field image of one HeLa cell compressed under an agarose plug. Arrows point to blebs at the plasma membrane. Scale bar: 5  $\mu$ m. **f**, HeLa cells treated with Sir-DNA were imaged by spinning disk microscopy before or after compression under an agarose plug, as indicated. Arrows point to nuclear blebs. Scale bar: 10  $\mu$ m. **g**, HeLa cells were subjected or not to compressive stress for 30 min. Cells were then recovered and stained for Annexin V and DAPI according to the manufacturer's instructions. Cells positive for Annexin V and negative for DAPI were counted in three independent experiments. Results are expressed as mean  $\pm$  SD (two tailed paired Student's T-test). **h**, HeLa cells plated on glass coverslips at 80% confluency were subjected or not to compressive stress. The stress was then removed and the medium changed to eliminate cell debris. 48 h later, cells were fixed and immunostained for Ki-67 and imaged at 20x. The number of Ki-67 positive cells was counted in each condition. Results are expressed as mean  $\pm$  SD (Kruskal-Wallis One Way analysis of variance on ranks. Three independent experiments were performed, counting cells in 2 random fields, corresponding to approximately 600 cells per condition per experiment).

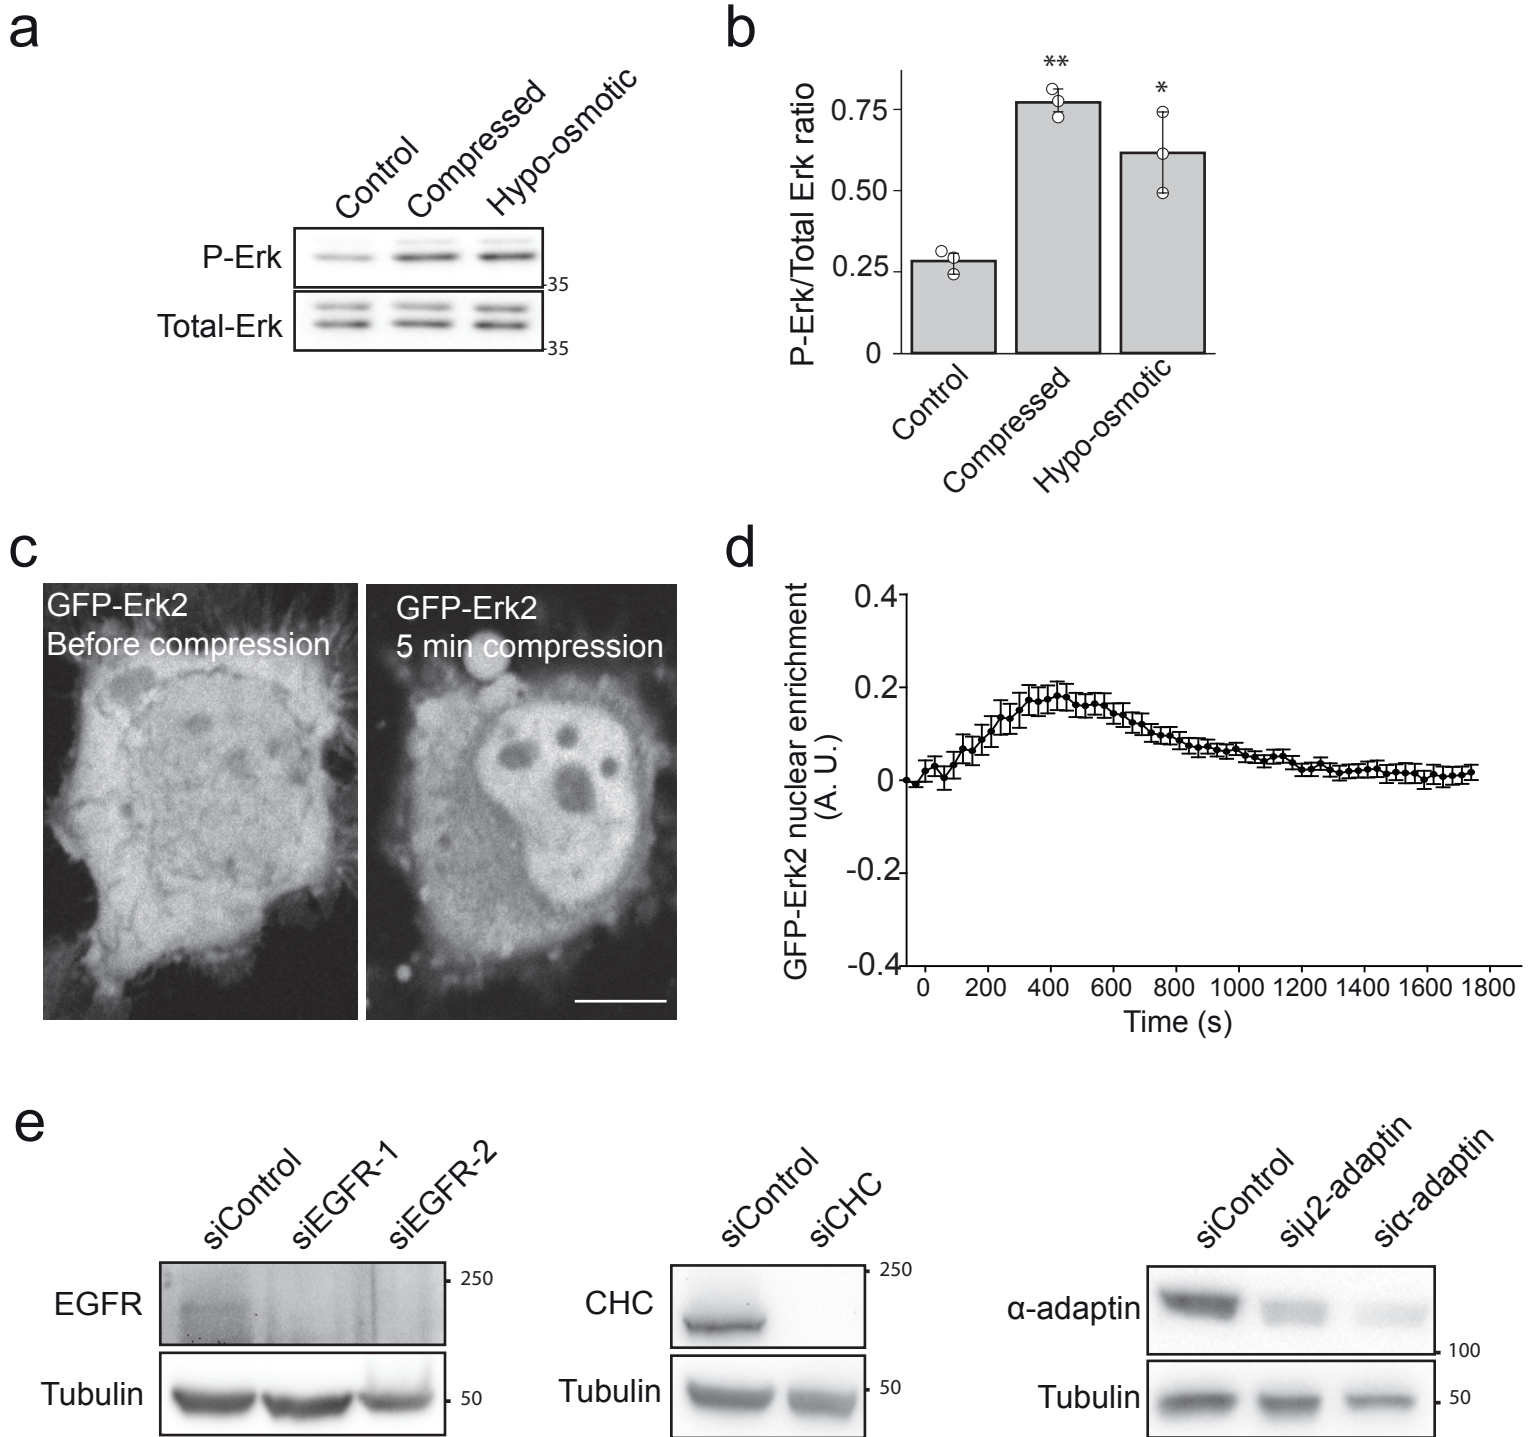

Figure S2

**Figure S2. Analysis on membrane tension and ERK.** **a**, Western-blot analysis of phospho-ERK (P-ERK) levels in HeLa cells uncompressed (control), compressed, or subjected to hypo-osmotic shock (90% water) for 30 min (representative image of three independent experiments). Total-ERK was used as loading control. **b**, Densitometry analysis of bands obtained in Western-blot as in **a**. Results are expressed as mean ratio of P-ERK/total ERK  $\pm$  SD from three independent experiments. (\*  $P < 0.005$ , \*\*  $P < 0.001$ , Kruskal-Wallis One Way analysis of variance on ranks). **c**, HeLa cells transfected with a plasmid encoding eGFP-tagged ERK2 were imaged by spinning disk microscopy before (left panel) or after (right panel) being compressed under an agarose plug. Scale bar: 10  $\mu$ m. **d**, Quantification of eGFP-ERK2 enrichment in the nucleus at the indicated time points after compression. 22 cells from 3 independent experiments were quantified. Results are expressed as mean  $\pm$  SE. **e**, HeLa cells were transfected with the indicated siRNAs. 72 h after transfection, cells were lysed and subjected to Western-blot analysis using the indicated antibodies. Tubulin was used as a loading control.

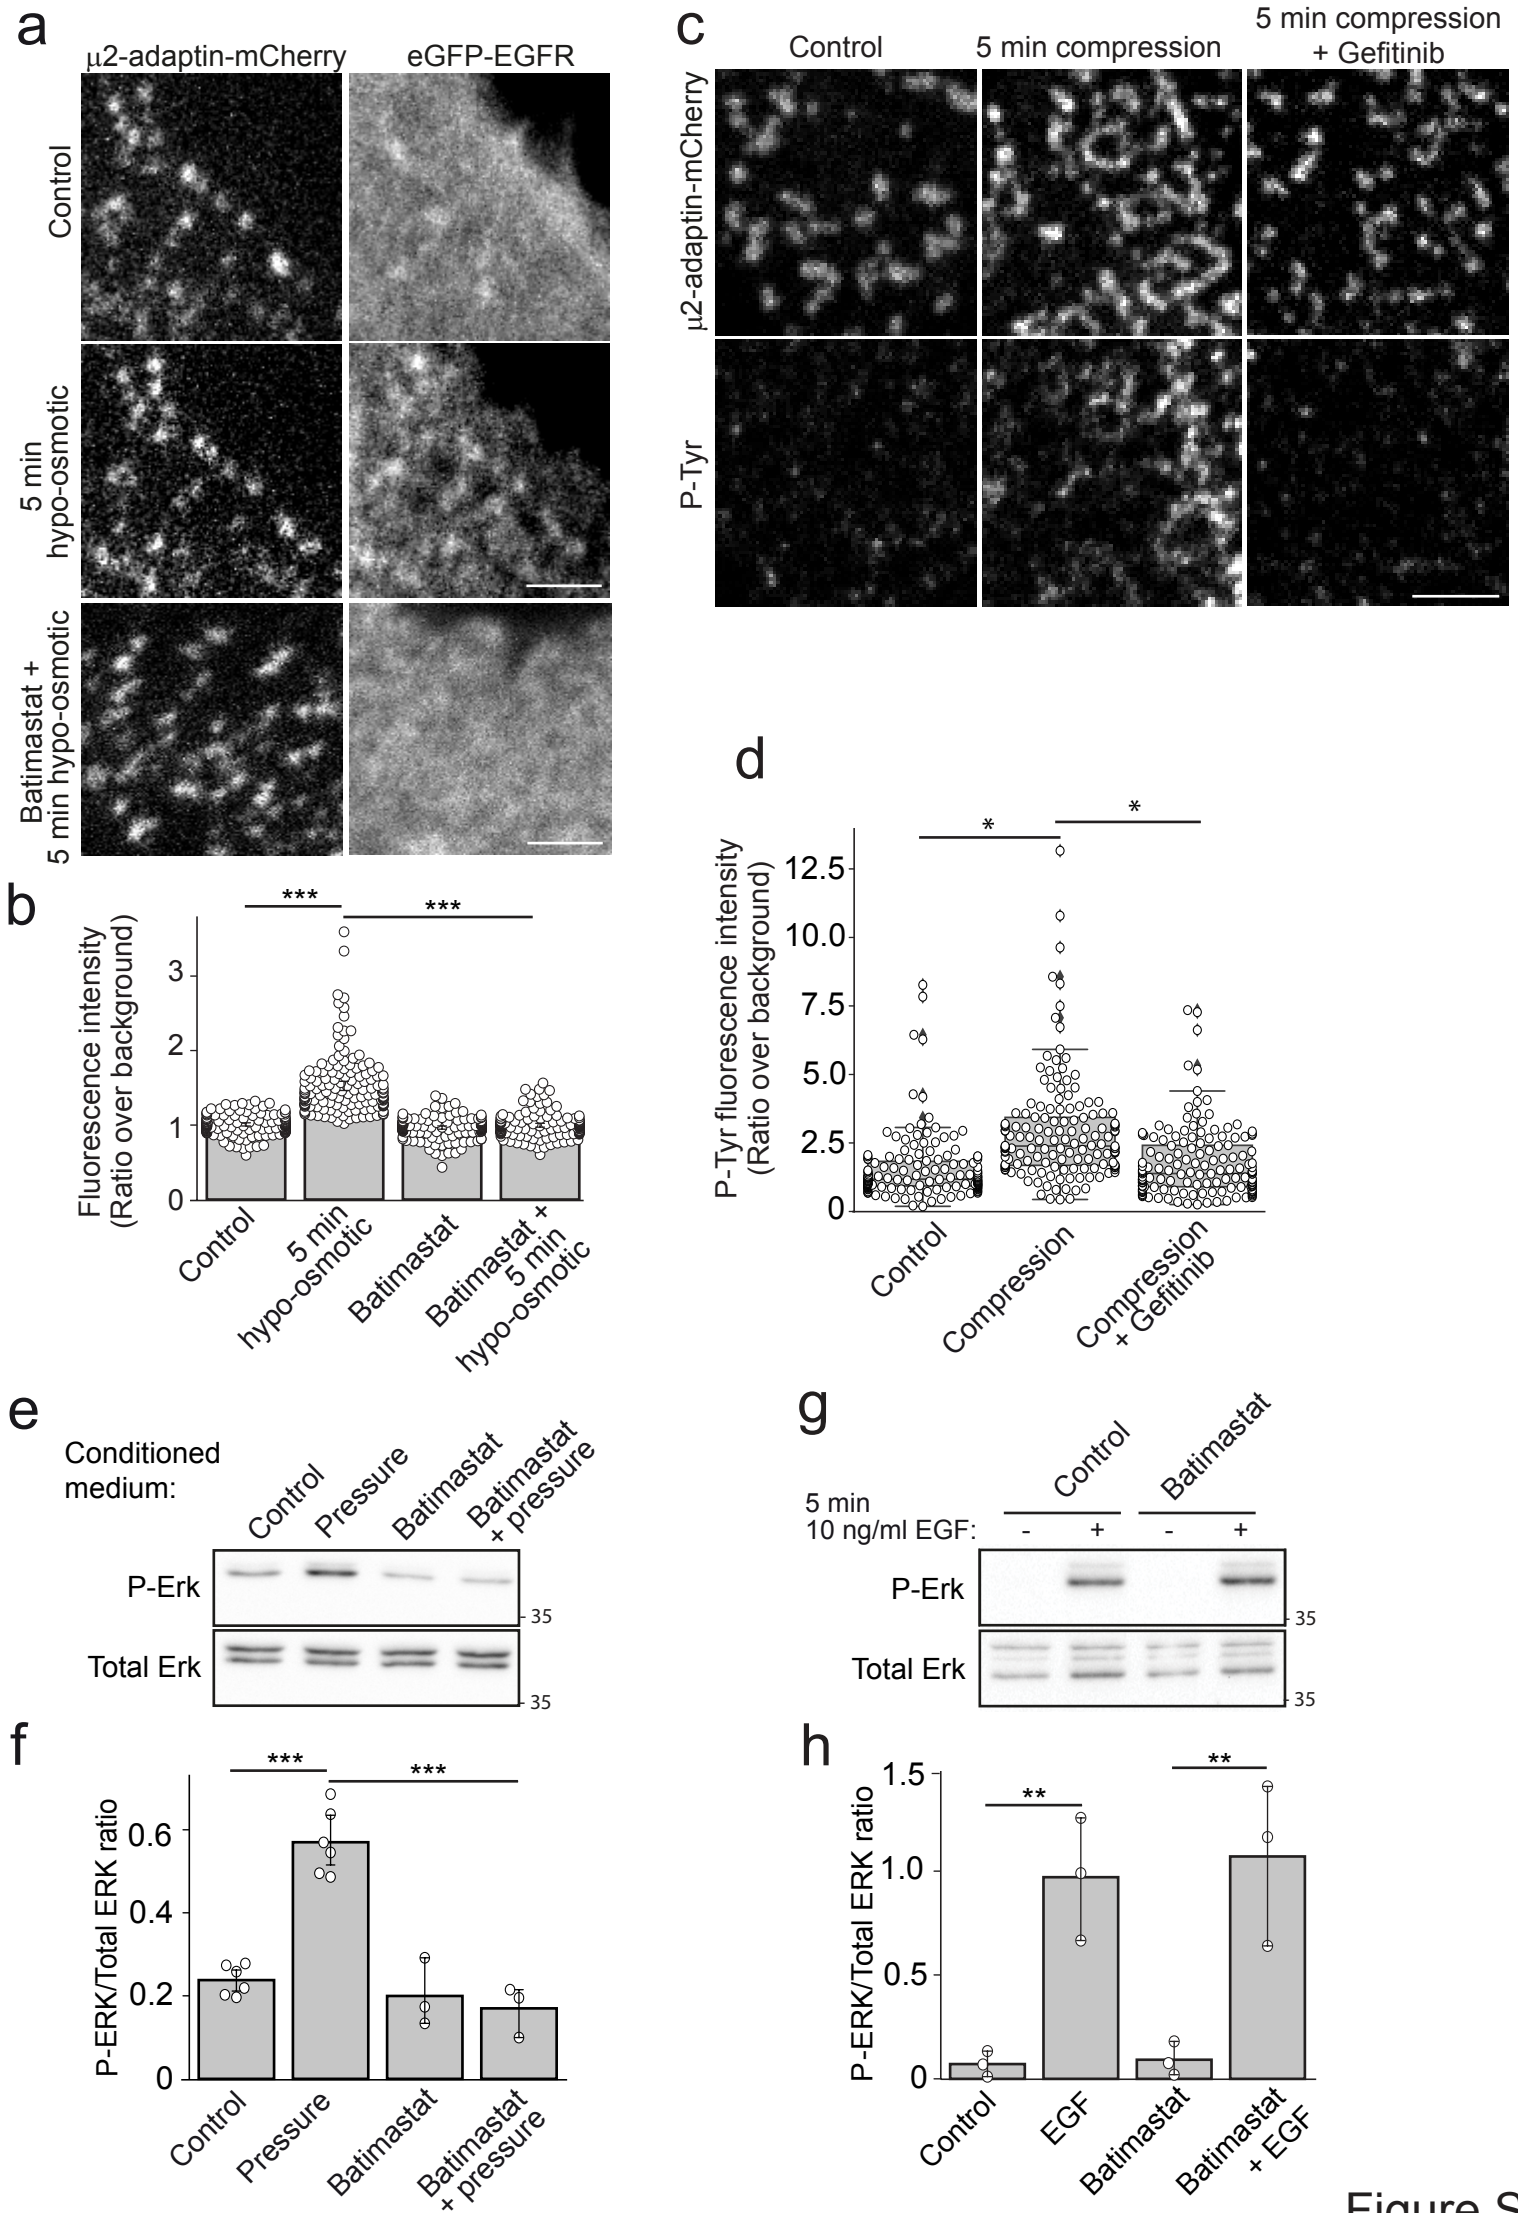

Figure S3

**Figure S3. Characterization of EGFR activation modalities under compression.** **a**, Genome-edited HeLa cells expressing endogenous mCherry-tagged  $\mu$ 2-adaptin were transfected with a plasmid encoding eGFP-tagged EGFR, seeded on glass, serum-starved for 2 h, subjected to hypo-osmotic shock (90% water) in the presence or not of Batimastat and imaged by TIRF microscopy every 10s for 20 min. Scale bar: 2.5  $\mu$ m. **b**, Quantification of eGFP-EGFR enrichment at CCSs before or 5 min after hypo-osmotic shock in cells treated as in **a** and showing some degree of EGFR recruitment at CCSs (\*\**P*<0.001, two tailed paired Student's T-test; 50 structures per experiment in three independent experiments were analysed). **c**, Genome-edited HeLa cells expressing endogenous mCherry-tagged  $\mu$ 2-adaptin were serum starved for 2 h, treated with 10  $\mu$ M Gefitinib or vehicle for 1 h and subjected or not to compression. Cells were fixed after 5 min of compression, without releasing compression. An immunostaining against phosphorylated tyrosines (P-Tyr) was then performed. Scale bar: 2.5  $\mu$ m. **d**, Quantification of P-Tyr enrichment at CCSs before (control) or 5 min after compression in cells treated as in **c** (\* *P*<0.05, Kruskal-Wallis One Way analysis of variance on ranks; 50 structures per experiment in three independent experiments were analysed). **e**, Western-blot analysis of phospho-ERK (P-ERK) levels in HeLa cells serum starved for 2 h, and treated for 5 min with conditioned medium from uncompressed cells (control and Batimastat conditions) or from cells compressed for 5 min in the presence or not of Batimastat (pressure and pressure + Batimastat conditions). **f**, Densitometry analysis of bands obtained in Western-blot as in **e**. Results are expressed as mean ratio of P-ERK/total ERK  $\pm$  SD from three independent experiments (two tailed paired Student's T-test) **g**, Western-blot analysis of phospho-ERK (P-ERK) levels in HeLa cells serum starved for 2 h, treated or not with Batimastat for 1 h, and stimulated with 10 ng/ml EGF or not as indicated (representative image of three independent experiments). Total-ERK was used as loading control. **h**, Densitometry analysis of bands obtained in Western-blot as in **g**. Results are expressed as mean ratio of P-ERK/total ERK  $\pm$  SD from three independent experiments (\*\* *P*<0.01, One Way Analysis of Variance – ANOVA, Student-Newman-Keuls).

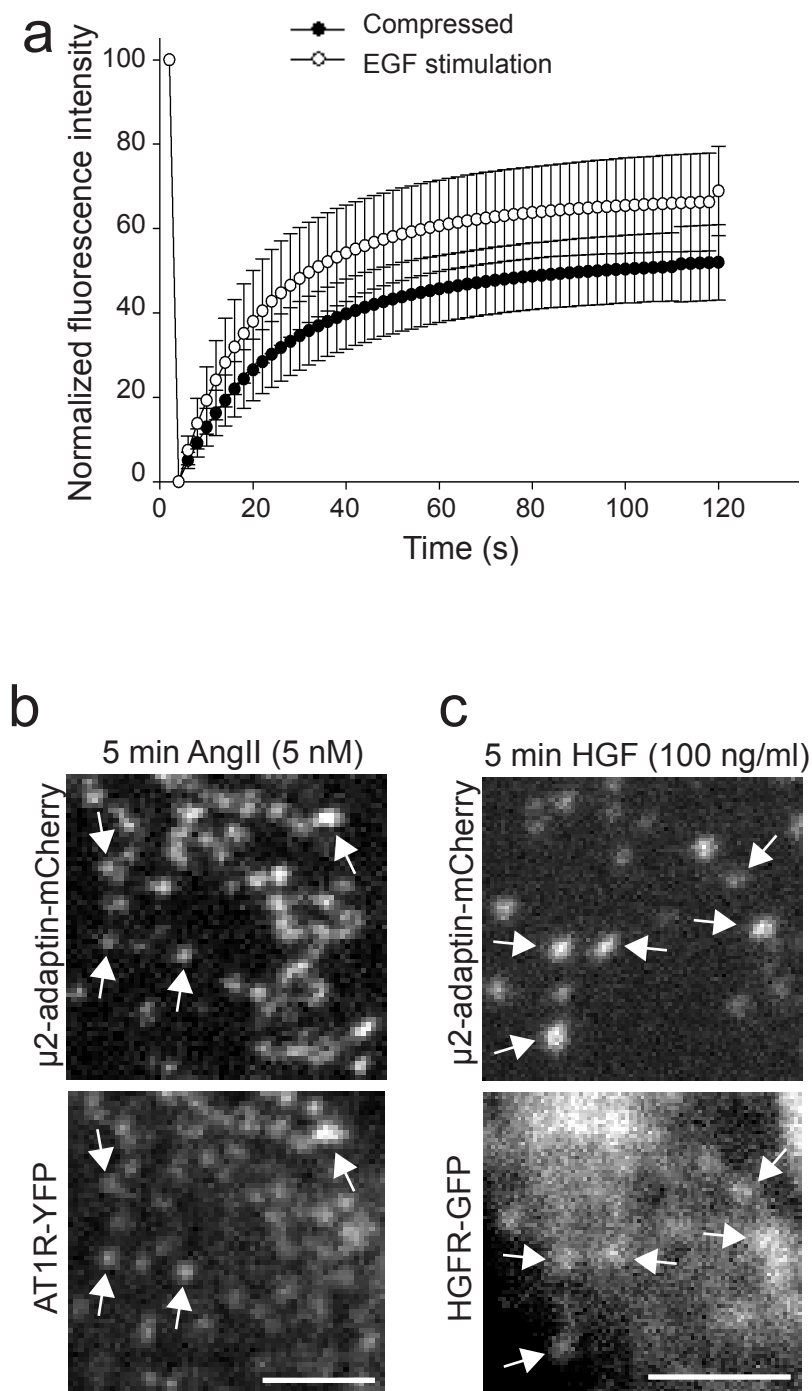

Figure S4

**Figure S4. Alteration of receptor sorting and dynamics under compression.** **a**, Quantification of fluorescence recovery after photobleaching of eGFP-EGFR fluorescence in individual CCSs in cells stimulated with EGF or compressed under an agarose plug, as indicated. All results are expressed as mean  $\pm$  SD. **b**, Genome-edited HeLa cells expressing endogenous mCherry-tagged  $\mu$ 2-adaptin were transfected with a plasmid encoding YFP-tagged AT1R. Cells were serum-starved for 2 h, stimulated with 5 nM Angiotensin II for 5 min and imaged by TIRF microscopy every 10s for 20 min. Scale bar: 2.5  $\mu$ m. **c**, Genome-edited HeLa cells expressing endogenous mCherry-tagged  $\mu$ 2-adaptin were transfected with a plasmid encoding GFP-tagged HGFR. Cells were serum-starved for 2 h, stimulated with HGF (100 ng/ml) for 5 min and imaged by TIRF microscopy every 10 s for 20 min. Scale bar: 2.5  $\mu$ m.

## Supplementary Movies

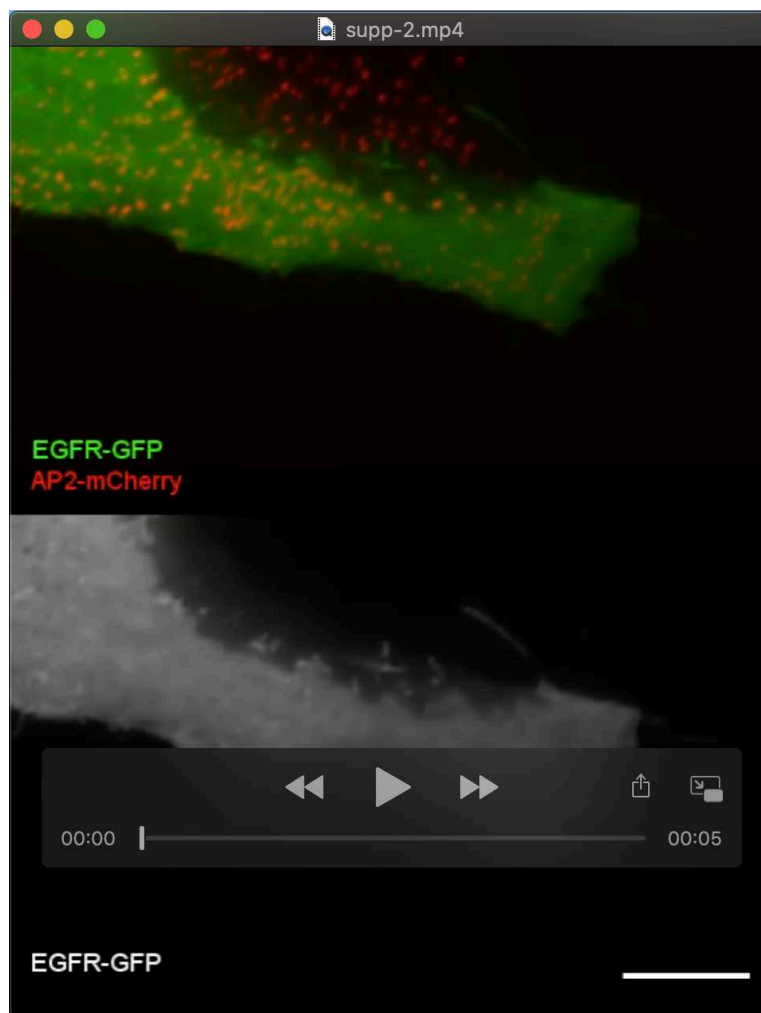

Movie 1. **EGFR recruitment to CCSs.** Genome-edited HeLa cells expressing endogenous mCherry-tagged  $\mu$ 2-adaptin were transfected with a plasmid encoding eGFP-tagged EGFR, seeded on glass and starved for 2 h. Cells were then compressed under an agarose plug (1 kPa pressure) and imaged by TIRF microscopy every 15s for 30 min. Scale bar: 10  $\mu$ m.



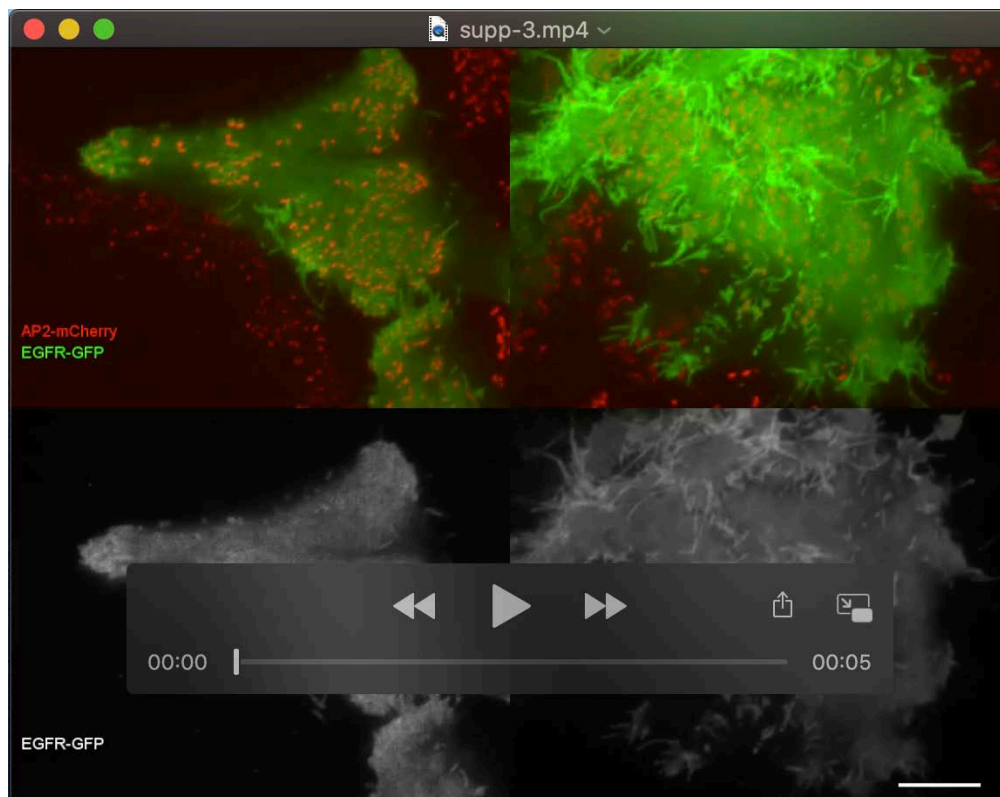

Movie 2. **EGFR recruitment to CCSs in the presence of Gefitinib or Batimastat.** Genome-edited HeLa cells expressing endogenous mCherry-tagged  $\mu$ 2-adaptin were transfected with a plasmid encoding eGFP-tagged EGFR, seeded on glass, starved for 2 h and treated with 10  $\mu$ M Gefitinib (left) or 10  $\mu$ M Batimastat (right). Cells were then compressed under an agarose plug (1 kPa pressure) and imaged by TIRF microscopy every 15 s for 30 min. Scale bar: 10  $\mu$ m.

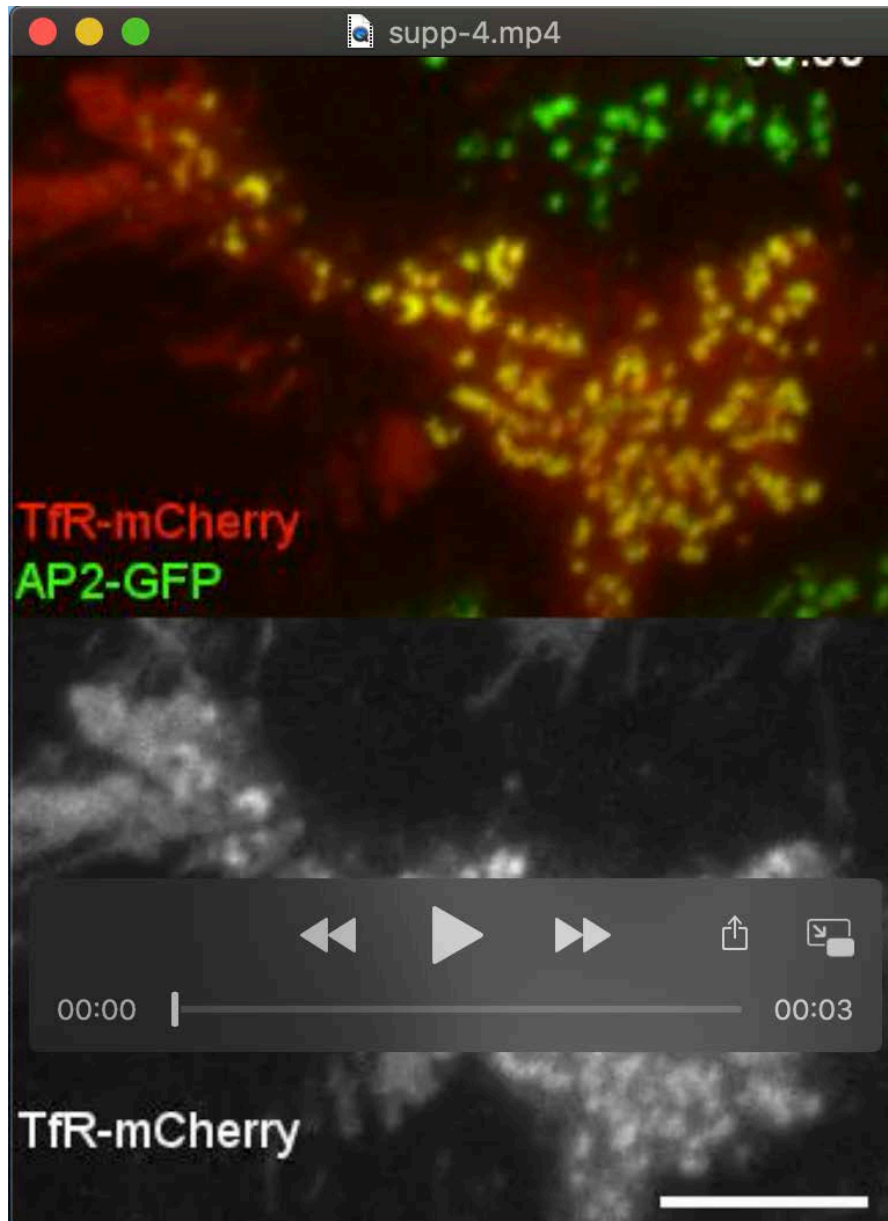

Movie 3. **TfR is lost from CCSs upon compression.** Genome-edited HeLa cells expressing endogenous GFP-tagged  $\mu$ 2-adaptin were transfected with a plasmid encoding mCherry-tagged TfR, seeded on glass, then compressed under an agarose plug (1 kPa pressure) and imaged by TIRF microscopy every 10 s for 30 min. Scale bar: 5  $\mu$ m.
